# Supplementary material for: Amine-functionalized Cu-MOF nanospheres towards label-free hepatitis B surface antigen electrochemical immunosensors
Source: Royal Society of Chemistry journal article supplement (doi:10.1039/d1tb00222h), 2021-01-01
Supplement: d1tb00222h1.pdf [file d1tb00222h1.pdf]

## SUPPORTING INFORMATION

# Amine-functionalized Cu-MOF Nanospheres towards Label-free Hepatitis B Surface Antigen Electrochemical Immunosensors

Muhammad Rezki<sup>1</sup>, Ni Luh Wulan Septiani<sup>1</sup>, Muhammad Iqbal<sup>1</sup>, Suksmandira Harimurti<sup>2</sup>, Poetro Lebdo Sambegoro<sup>3</sup>, Damar Rastri Adhika<sup>1,4</sup>, Brian Yulianto<sup>1,3</sup>

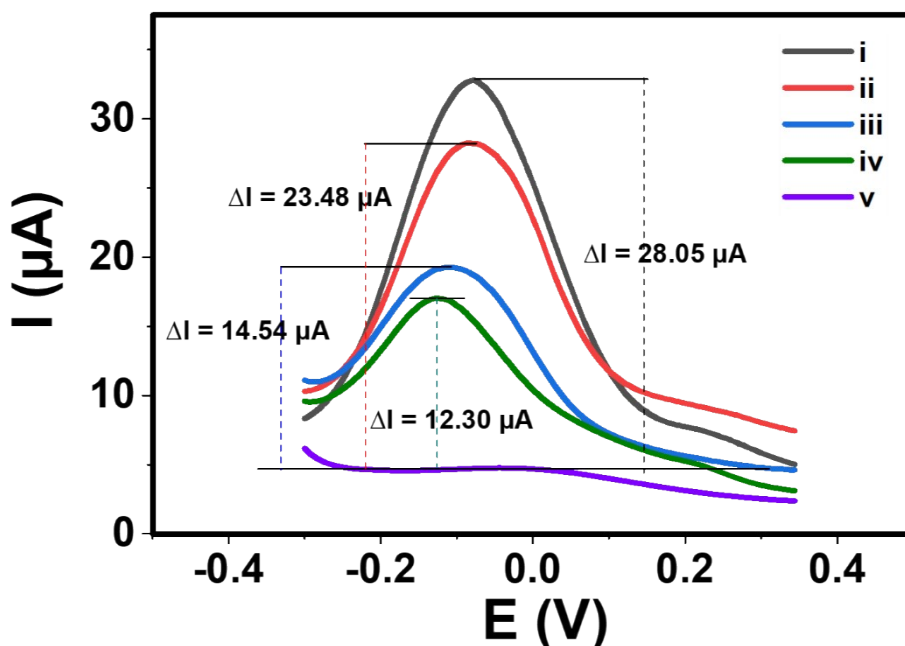

**Fig S1.** DPV response of four synthesized Cu-NH<sub>2</sub>BDC series; (i) CuNH<sub>2</sub>BDC-TP, (ii) CuNH<sub>2</sub>BDC-2TP, (iii) CuNH<sub>2</sub>BDC-P, (iv) CuNH<sub>2</sub>BDC-T and (v) bare GCE. The CuNH<sub>2</sub>BDC-TP delivers the highest current compare to the others, indicating its high potential as HBsAg sensor.

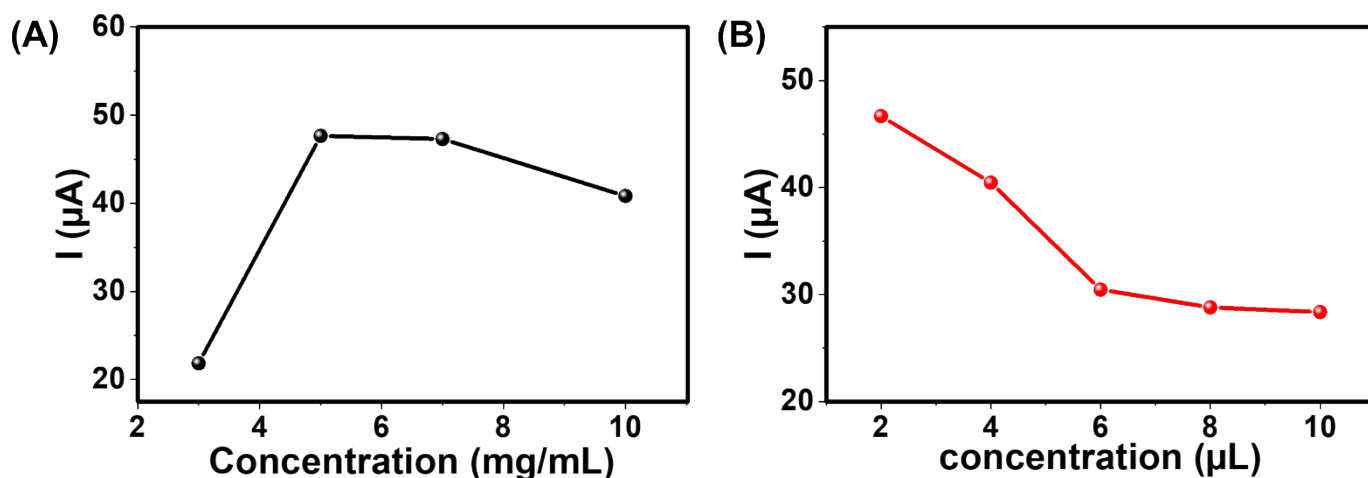

**Fig S2.** The current response in order to determine the optimum condition of the sensor according to the variation of (A) Cu-NH<sub>2</sub>BDC concentration and (B) amount of antibody
